# Supplementary material for: Targeting NK-1R attenuates renal fibrosis via modulating inflammatory responses and cell fate in chronic kidney disease
Source: PubMed Central journal article supplement (PMC10080018; doi:10.3389/fimmu.2023.1142240), 2023-03-24
Supplement: DataSheet_1.pdf [file DataSheet_1.pdf]

## Supporting information

### Targeting NK-1R attenuates renal fibrosis via modulating inflammatory responses and cell fate in chronic kidney disease

Enyi Zhu<sup>1\*</sup>, Yang Liu<sup>1\*</sup>, Ming Zhong<sup>1\*</sup>, Yu Liu<sup>1</sup>, Xi Jiang<sup>3</sup>, Xiaorong Shu<sup>4</sup>, Na Li<sup>1</sup>, Hui Guan<sup>1</sup>,  
Yin Xia<sup>5</sup>, Jinhong Li<sup>1#</sup>, Hui-yao Lan<sup>2,6#</sup>, Zhihua Zheng<sup>1#</sup>

#### Inventory of supplementary data

|                                 |         |
|---------------------------------|---------|
| 1. Table S1.....                | Page 2  |
| 2. Table S2.....                | Page 3  |
| 3. Table S3.....                | Page 4  |
| 4. Table S4.....                | Page 5  |
| 5. Table S5.....                | Page 6  |
| 6. Supplementary Figure 1.....  | Page 7  |
| 7. Supplementary Figure 2.....  | Page 8  |
| 8. Supplementary Figure 3.....  | Page 9  |
| 9. Supplementary Figure 4.....  | Page 10 |
| 10. Supplementary Figure 5..... | Page 11 |

**Table S1. The clinical characteristics of CKD patients.**

| Clinical variables                                 | Control (n=6)       | Patients with CKD (n=21)                                                                                                                                              | <i>P</i>           |
|----------------------------------------------------|---------------------|-----------------------------------------------------------------------------------------------------------------------------------------------------------------------|--------------------|
| Female/male (n)                                    | 1/5                 | 5/16                                                                                                                                                                  | <i>&gt;0.999</i>   |
| Age                                                | 45.67±8.31          | 42.81±11.13                                                                                                                                                           | <i>0.567</i>       |
| White blood cell (10 <sup>9</sup> )                | 6.46±0.43           | 6.79±1.64                                                                                                                                                             | <i>0.413</i>       |
| Hemoglobin (g/L)                                   | 141.83±18.19        | 114.43±19.48                                                                                                                                                          | <i>0.005*</i>      |
| Platelet (10 <sup>9</sup> )                        | 258.5±76.24         | 270.86±88.06                                                                                                                                                          | <i>0.758</i>       |
| Serum creatinine (Scr, μmol/L)                     | 88.50±17.17         | 241.61±159.50                                                                                                                                                         | <i>0.0003****</i>  |
| Estimated glomerular filtrationrate (eGFR, μmol/L) | 87.30±21.38         | 33.92±17.74                                                                                                                                                           | <i>0.0001*****</i> |
| Blood urea nitrogen (BUN, mmol/L)                  | 4.88±1.79           | 14.21±19.24                                                                                                                                                           | <i>0.0401*</i>     |
| Uric acid (UA, μmol/L)                             | 347.33±94.01        | 482.21±129.10                                                                                                                                                         | <i>0.0695</i>      |
| Albumin (g/L)                                      | 39.47±3.50          | 37.60±5.22                                                                                                                                                            | <i>0.419</i>       |
| Kidney disease                                     |                     | IgA nephrology (52.38%)<br>Diabetic nephropathy (28.57%)<br>Hypertension nephropathy (9.52%)<br>Lupus nephritis (4.76%)<br>Focal segmental glomerulosclerosis (4.76%) |                    |
|                                                    | Renal cancer (100%) |                                                                                                                                                                       |                    |

**Table S2. The baseline features of CKD patients and control individuals.**

| Clinical variables                                   | Control (n=20) | Patients with CKD (n=28) | P          |
|------------------------------------------------------|----------------|--------------------------|------------|
| Female/male (n)                                      | 3/17           | 8/20                     | 0.319      |
| Age                                                  | 54.15±5.74     | 59.29±11.48              | 0.0723     |
| White blood cell (10 <sup>9</sup> )                  | 5.54±0.79      | 6.99±1.86                | 0.0007***  |
| Hemoglobin (g/L)                                     | 146.80±14.26   | 107.96±27.53             | 0.0001**** |
| Platelet (10 <sup>9</sup> )                          | 233.20±42.79   | 214.07±62.17             | 0.241      |
| Serum creatinine (Scr, µmol/L)                       | 75.85±13.33    | 457.68±317.34            | 0.0001**** |
| Estimated glomerular filtrationrate (eGFR, µmol/L)   | 94.89±9.25     | 21.24±18.06              | 0.0001**** |
| Blood urea nitrogen (BUN, mmol/L)                    | 4.83±1.08      | 18.97±12.09              | 0.0001**** |
| Uric acid (UA, µmol/L)                               | 348.16±47.32   | 431.97±114.37            | 0.0013**   |
| Cystatin C (Cys C, mg/L)                             | 0.83±0.14      | 3.37±1.62                | 0.0001**** |
| Total cholesterol (TC, mmol/L)                       | 4.47±0.58      | 4.51±1.53                | 0.9075     |
| Triglyceride (TG, mmol/L)                            | 1.10±0.35      | 1.25±0.59                | 0.2932     |
| Low density lipoprotein cholesterol (LDL-C, mmol/L)  | 2.54±0.51      | 2.65±1.26                | 0.6875     |
| High density lipoprotein cholesterol (HDL-C, mmol/L) | 1.25±0.22      | 1.08±0.32                | 0.0472*    |
| Albumin (g/L)                                        | 43.93±1.84     | 36.61±4.77               | 0.0001**** |

**Table S3. Sequences of DNA oligonucleotides**

| Name                                                                                                                                                                                      | Sense Primer (5'-3')                              | Antisense Primer (5'-3')                           |
|-------------------------------------------------------------------------------------------------------------------------------------------------------------------------------------------|---------------------------------------------------|----------------------------------------------------|
| <b>Primers for RT-qPCR</b>                                                                                                                                                                |                                                   |                                                    |
| Human $\beta$ -actin                                                                                                                                                                      | AAGATGACCCAGATCATGTTTGAG                          | GCAGCTCGTAGCTCTTCTCCAG                             |
| Human TACR1                                                                                                                                                                               | CTCAACCACAGAGACCATGC                              | GGGGGAGGAAGTAGATCAGC                               |
| Human TFAP4                                                                                                                                                                               | GAGGGCTCTGTAGCCTTGC                               | GAATCCC CGGTTGATGCTCT                              |
| Human CTGF                                                                                                                                                                                | CAGCATGGACGTTCTGCTG                               | AACCACGGTTTGGTCCTTGG                               |
| Human MMP9                                                                                                                                                                                | ACGCAGACATCGTCATCCAGT                             | GGACCACAACCTCGTCATCGTC                             |
| Mouse $\beta$ -actin                                                                                                                                                                      | CCCTGAAGTACCCCATGAA                               | CTTTTCACGGTTGGCCTTAG                               |
| Mouse Tacr1                                                                                                                                                                               | CTCCACCAACACTTCTGAGTC                             | TCACCACTGTATTGAATGCAGC                             |
| Mouse Tac1                                                                                                                                                                                | AAGCGGGATGCTGATTCCTC                              | TCTTTCGTAGTTCTGCATTGCG                             |
| Mouse Collagen I                                                                                                                                                                          | GCTCCTCTTAGGGGCCACT                               | CCACGTCTCACCATTGGGG                                |
| Mouse $\alpha$ -SMA                                                                                                                                                                       | GTCCCAGACATCAGGGAGTAA                             | TCGGATACTTCAGCGTCAGGA                              |
| Mouse MCP-1                                                                                                                                                                               | TTAAAAACCTGGATCGGAACCAA                           | GCATTAGCTTCAGATTTACGGGT                            |
| Mouse TNF- $\alpha$                                                                                                                                                                       | CATCTTCTCAA AATTCGAGTGACAA                        | TGGGAGTAGACAAGGTACAACCC                            |
| <b>Primers for ChIP</b>                                                                                                                                                                   |                                                   |                                                    |
| NK-1R                                                                                                                                                                                     | GCAAGTAGCAAGCAGCAAAA                              | TATAACCCCTGCAGAGACG                                |
| Negative (GAPDH)                                                                                                                                                                          | TACTAGCGGTTTACGGGCGCACGT                          | TCGAACAGGAGGAGCAGAGAGCGAA                          |
| <b>Primers for cloning (Restriction enzyme sites were underlined; homologous arm was indicated by lowercase letters; initiation codon and stop codon were indicated by bold letters.)</b> |                                                   |                                                    |
| <b>Cloning into pCDH</b>                                                                                                                                                                  |                                                   |                                                    |
| TACR1                                                                                                                                                                                     | agattctagagctagc <u>gaattc</u> GCCACCATGGATAACGTC | atccttcgcgccg <u>ggatcc</u> CTAGGAGAGC ACATTGGAGG  |
|                                                                                                                                                                                           | CTCCCCGGT                                         | AG                                                 |
| TFAP4                                                                                                                                                                                     | agattctagagctagc <u>gaattc</u> GCCACCATGGAGTATTTC | atccttcgcgccg <u>ggatcc</u> TCAGGGAAGCTCCCCGTCC    |
|                                                                                                                                                                                           | ATGGTGCCAC                                        |                                                    |
| <b>Cloning into pGL3-basic</b>                                                                                                                                                            |                                                   |                                                    |
| p-(-1.5/+0.1k)                                                                                                                                                                            | cgagctcttacgcgt <u>gctagc</u> AAATCCCAGGCTCCGAAA  | acttagatcgagat <u>ctcgag</u> CTGGAGCTTCGTATCCAGCTG |
|                                                                                                                                                                                           | AAATAC                                            |                                                    |
| p-mutA                                                                                                                                                                                    | TCCACTGGTATGCTTTCCCAAATCCTTCCTTCC                 | GGGAAAGCATACCAGTGGAGGACAATCAACTTCC                 |
|                                                                                                                                                                                           | T                                                 |                                                    |
| p-mutB                                                                                                                                                                                    | AGGTATGCGCGCAGCTGCCGCGCTG                         | AGCTGCGCGCATACTGACAACCTGTCTCATTCCACC               |

**Table S4. Comparison of clinical features between CKD patients with low and high renal NK-1R expression.**

| Clinical variables                                   | Patients with NK-1R protein level |                           | <i>P</i> |
|------------------------------------------------------|-----------------------------------|---------------------------|----------|
|                                                      | Low expression<br>(n=11)          | High expression<br>(n=10) |          |
| Female/male (n)                                      | 6/5                               | 5/5                       | >0.999   |
| Age                                                  | 47.74±8.80                        | 41.80±13.69               | 0.703    |
| White blood cell (10 <sup>9</sup> )                  | 6.41±1.53                         | 7.21±1.75                 | 0.276    |
| Hemoglobin (g/L)                                     | 123.36±14.62                      | 104.60±20.01              | 0.023*   |
| Platelet (10 <sup>9</sup> )                          | 273.73±85.85                      | 267.70±94.99              | 0.880    |
| Serum creatinine (Scr, μmol/L)                       | 176.80±78.73                      | 312.90±197.14             | 0.065    |
| Estimated glomerular filtrationrate (eGFR, μmol/L)   | 41.55±17.57                       | 25.54±14.40               | 0.035*   |
| Blood urea nitrogen (BUN, mmol/L)                    | 8.51±2.77                         | 20.47±27.03               | 0.197    |
| Uric acid (UA, μmol/L)                               | 522.75±133.60                     | 437.63±133.97             | 0.135    |
| Cystatin C (Cys C, mg/L)                             | 1.93±0.49                         | 3.20±1.69                 | 0.043*   |
| Total cholesterol (TC, mmol/L)                       | 5.52±1.55                         | 5.88±2.84                 | 0.723    |
| Triglyceride (TG, mmol/L)                            | 1.87±0.88                         | 2.33±1.21                 | 0.328    |
| Low density lipoprotein cholesterol (LDL-C, mmol/L)  | 3.03±0.92                         | 3.27±2.16                 | 0.745    |
| High density lipoprotein cholesterol (HDL-C, mmol/L) | 1.17±0.30                         | 1.18±0.41                 | 0.873    |
| Albumin (g/L)                                        | 38.41±3.06                        | 36.70±6.95                | 0.487    |
| Urine protein (24h g/L)                              | 2.16±1.51                         | 5.54±3.91                 | 0.317    |

**Table S5. Comparison of clinical characteristics between CKD patients with low and high serum SP level.**

| Clinical variables                                   | Patients with SP protein level |                           | <i>P</i> |
|------------------------------------------------------|--------------------------------|---------------------------|----------|
|                                                      | Low expression<br>(n=14)       | High expression<br>(n=14) |          |
| Female/male (n)                                      | 7/7                            | 1/13                      | 0.033*   |
| Age                                                  | 63.00±11.58                    | 55.57±10.48               | 0.087    |
| White blood cell (10 <sup>9</sup> )                  | 6.68±1.86                      | 7.31±1.86                 | 0.374    |
| Hemoglobin (g/L)                                     | 114.86±26.87                   | 101.07±27.38              | 0.190    |
| Platelet (10 <sup>9</sup> )                          | 221.71±48.18                   | 206.43±74.7               | 0.526    |
| Serum creatinine (Scr, μmol/L)                       | 255.21±164.87                  | 660.15±413.43             | 0.003**  |
| Estimated glomerularfiltrationrate (eGFR, μmol/L)    | 29.94±19.13                    | 12.53±12.19               | 0.008**  |
| Blood urea nitrogen (BUN, mmol/L)                    | 13.41±7.88                     | 24.53±13.22               | 0.012*   |
| Uric acid (UA, μmol/L)                               | 435.00±117.19                  | 428.95±115.81             | 0.892    |
| Cystatin C (Cys C, mg/L)                             | 2.45±1.09                      | 4.30±1.56                 | 0.0011** |
| Total cholesterol (TC, mmol/L)                       | 4.83±1.60                      | 4.18±1.44                 | 0.265    |
| Triglyceride (TG, mmol/L)                            | 1.11±0.41                      | 1.39±0.72                 | 0.224    |
| Low density lipoprotein cholesterol (LDL-C, mmol/L)  | 3.06±1.37                      | 2.23±1.02                 | 0.082    |
| High density lipoprotein cholesterol (HDL-C, mmol/L) | 1.16±0.38                      | 1.01±0.24                 | 0.223    |
| Albumin (g/L)                                        | 37.69±5.41                     | 35.53±3.94                | 0.238    |

## Supplementary Figure 1

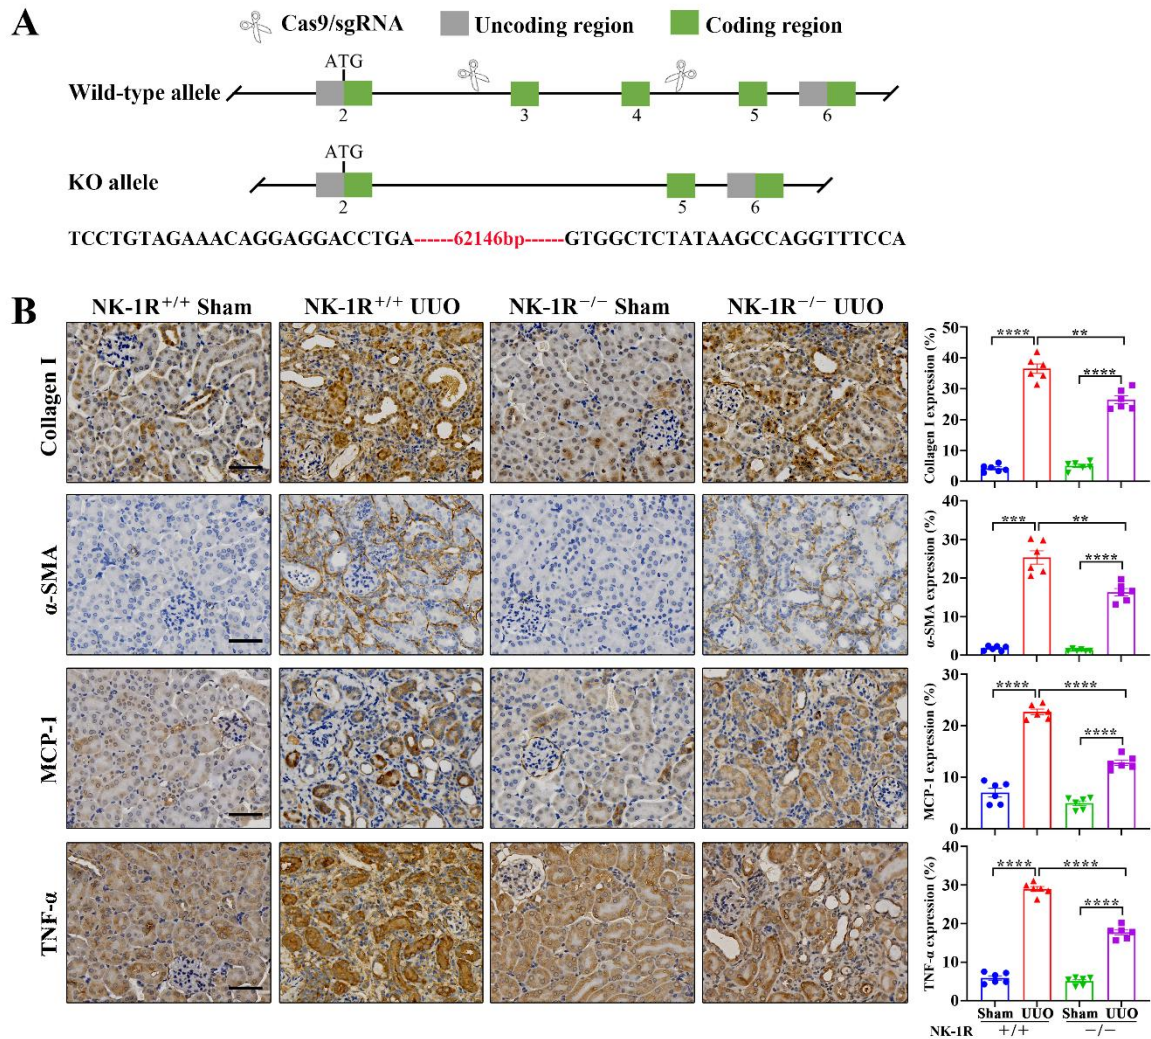

### Supplementary Figure 1. Knockout of NK-1R attenuated renal inflammation and fibrosis in obstructed kidneys.

(A) The strategy for generating NK-1R knockout mice. (B) Immunohistochemistry staining displayed a reduction in Collagen I,  $\alpha$ -SMA, MCP-1, and TNF- $\alpha$  protein levels following UUO. Scale bar, 50  $\mu$ m. Data are shown as mean  $\pm$  SEM from groups of six mice. \*\*,  $p < 0.01$ ; \*\*\*,  $p < 0.001$ ; \*\*\*\*,  $p < 0.0001$ .

## Supplementary Figure 2

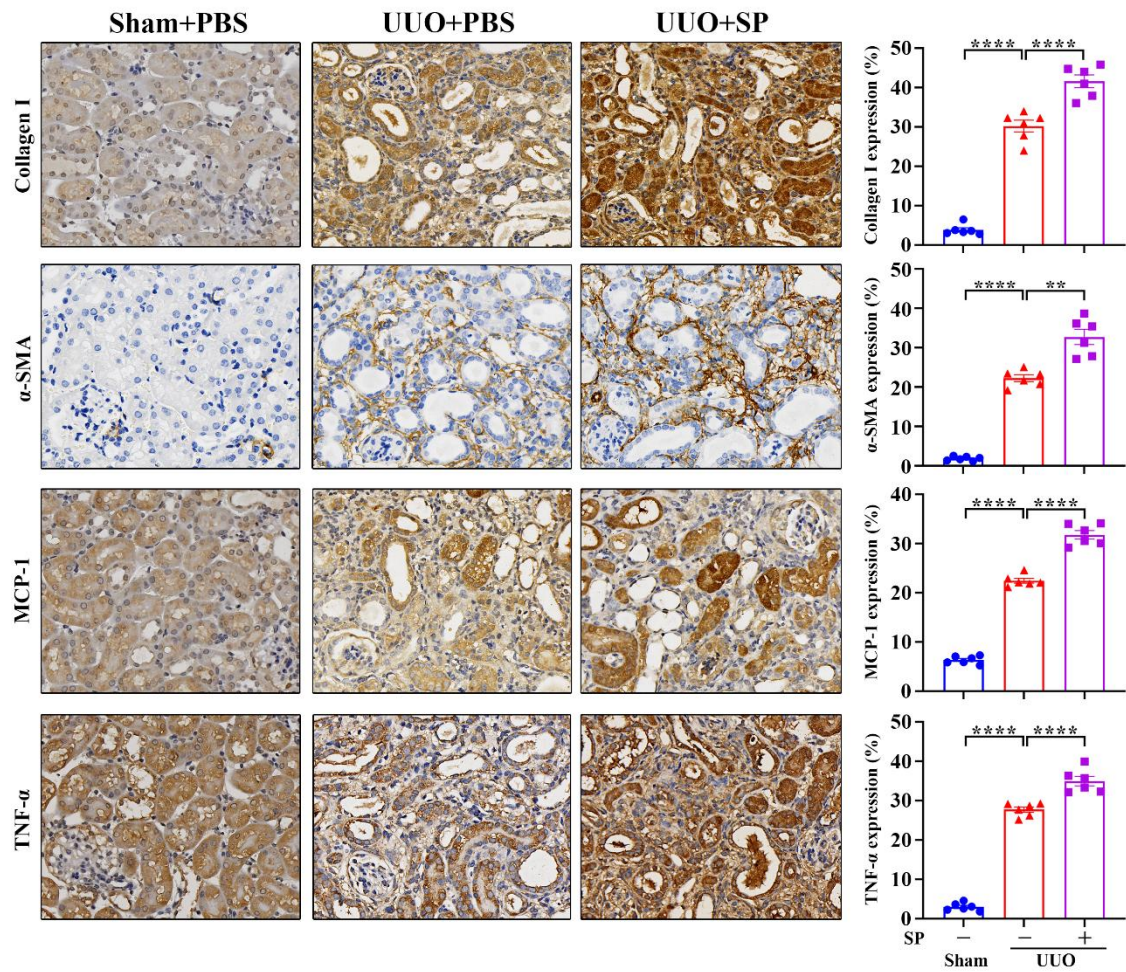

### Supplementary Figure 2. SP administration aggravated renal inflammation and fibrosis upon UUO insult.

Immunohistochemistry staining showed that treatment with SP intensified the expression of Collagen I,  $\alpha$ -SMA, MCP-1, and TNF- $\alpha$  upon UUO injury. Scale bar, 50  $\mu$ m. Data are shown as mean  $\pm$  SEM from groups of six mice. \*\*,  $p < 0.01$ ; \*\*\*\*,  $p < 0.0001$ .



## Supplementary Figure 3

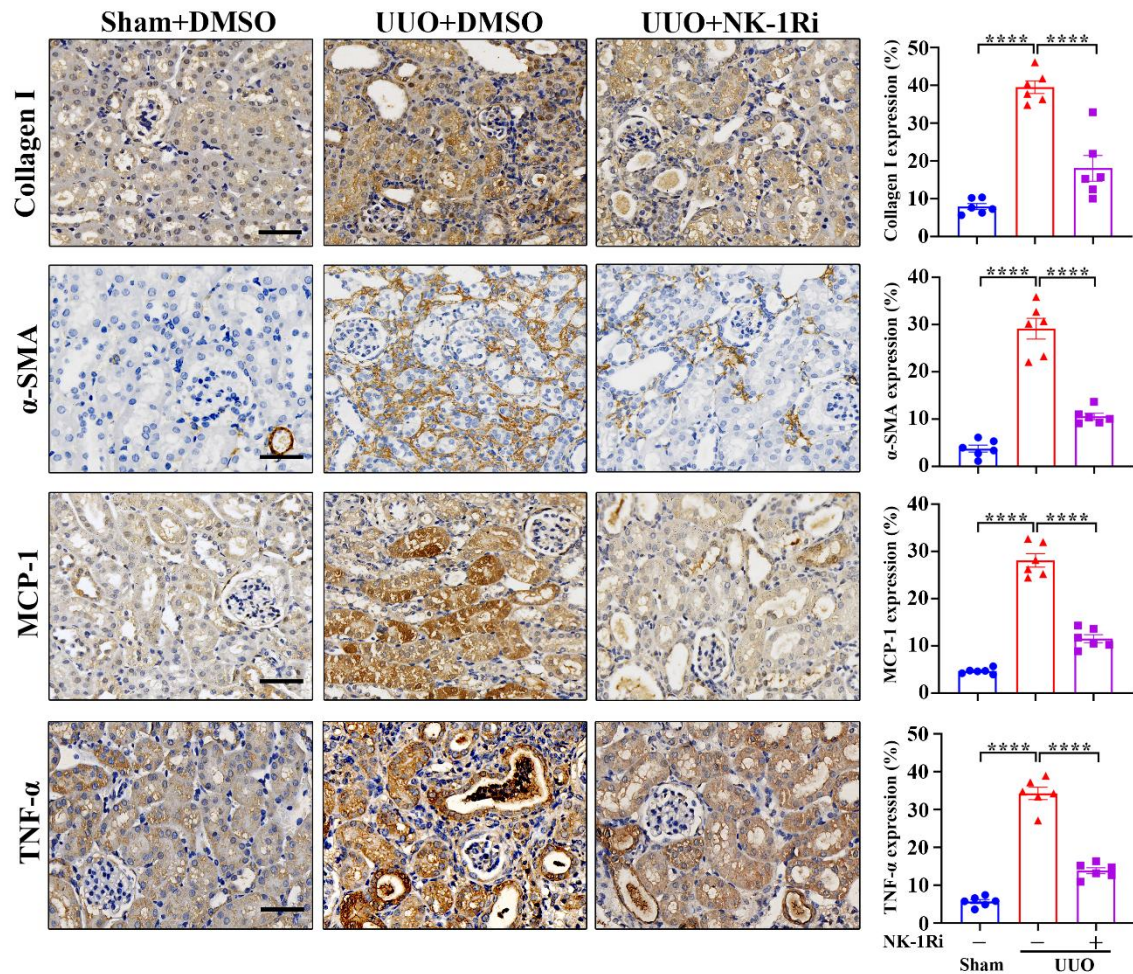

**Supplementary Figure 3. Treatment with an NK-1R inhibitor alleviated UUUO-stimulated renal inflammation and fibrosis in the kidney.**

Immunohistochemistry staining showed that treatment with an NK-1R inhibitor attenuated the UUUO-induced increase in Collagen I,  $\alpha$ -SMA, MCP-1, and TNF- $\alpha$  levels. Representative images (left panels) and quantitative data (right panels) are shown. Scale bar, 50  $\mu$ m. Data are shown as mean  $\pm$  SEM from groups of six mice. \*\*\*\*,  $p < 0.0001$ .

## Supplemeantary Figure 4

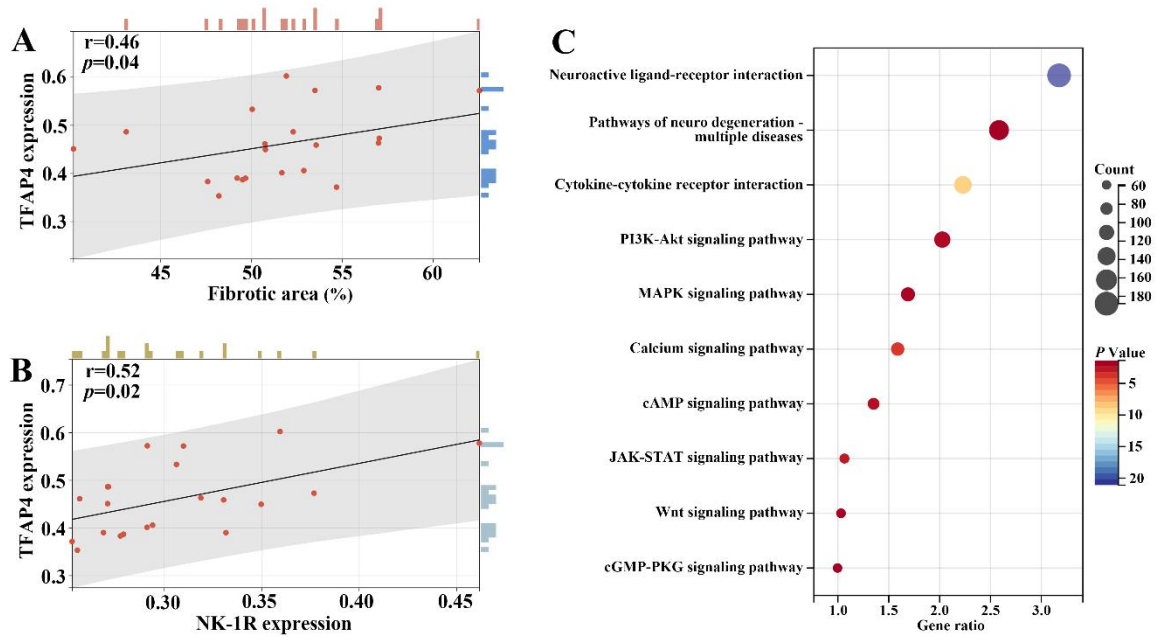

**Supplementary Figure 4. TFAP4 expression was positively associated with fibrotic extent and NK-1R expression in CKD kidneys.**

(A, B) Correlation between TFAP4 protein levels and fibrotic extent (A) and NK-1R protein levels (B) in 21 patients with CKD. (C) The KEGG enrichment of TFAP4 co-expressed genes in GSE66494. TFAP4 co-expressed genes were selected using Spearman's correlation test in GSE66494 with a threshold of  $p < 0.05$  and  $|r| \geq 0.3$ .

## Supplementary Figure 5

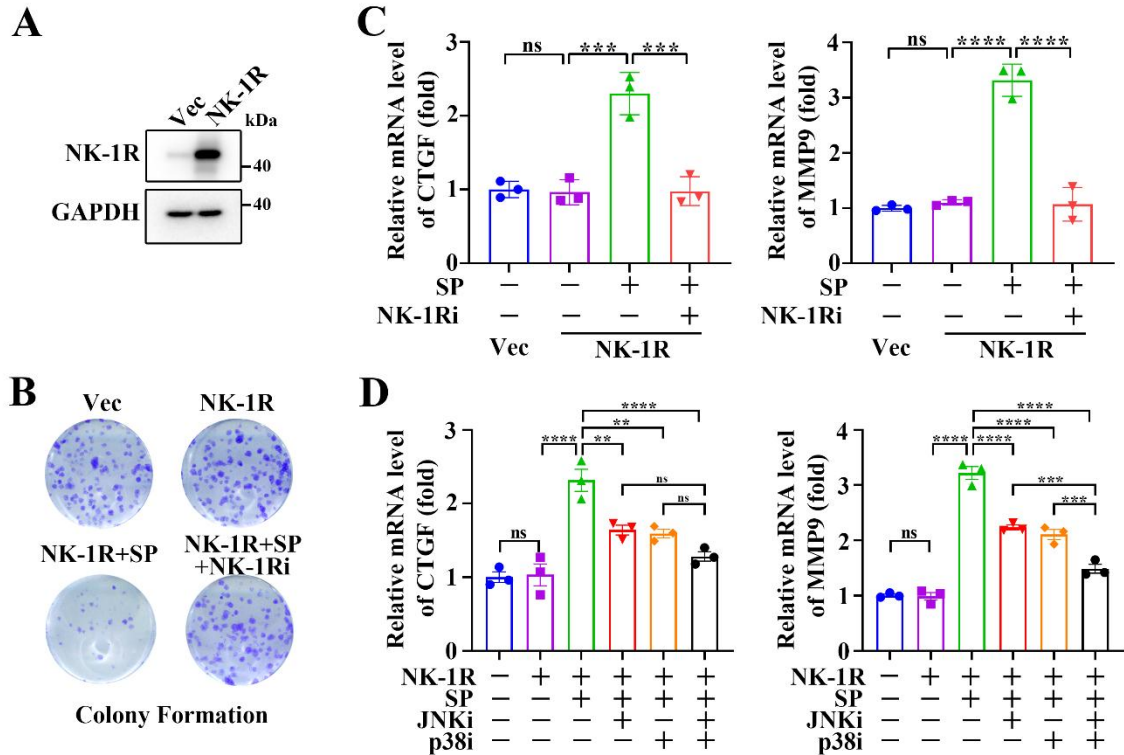

**Supplementary Figure 5. The SP/NK-1R/MAPK pathway inhibited the growth of renal tubular epithelial cells and promoted fibrogenesis.**

(A) Western blotting showed the overexpression of NK-1R in HK-2 cells. (B) The representative images of colony formation in NK-1R-overexpressed HK-2 cells. (C) RT-qPCR showed that treatment with an NK-1R inhibitor impeded the SP-induced elevation in the mRNA levels of profibrogenic genes in HK-2 cells stably overexpressing NK-1R. (D) RT-qPCR showed that p38 or JNK inhibitors or their combination decreased SP-stimulated increases in the mRNA levels of profibrogenic genes in NK-1R-overexpressed HK-2 cells. \*\*,  $p < 0.01$ ; \*\*\*,  $p < 0.001$ ; \*\*\*\*,  $p < 0.0001$ ; ns, not significant.
